1 **Title: Desiccation stress acts as cause as well as cost of dispersal in *Drosophila***  
2 ***melanogaster***

3 **Authors:** Abhishek Mishra<sup>1</sup>, Sudipta Tung<sup>2</sup>, V.R. Shree Sruti<sup>3</sup>, P.M. Shreenidhi<sup>4</sup>, and Sutirth  
4 Dey\*

5 **Affiliation:**

6 Population Biology Laboratory, Biology Division, Indian Institute of Science Education and  
7 Research-Pune, Dr. Homi Bhabha Road, Pune, Maharashtra, India, 411 008

8

9 1 Present Address: Department of Microbiology, The Ohio State University, Columbus, OH,  
10 USA, 43210

11

12 2 Present Address: Department of Biology, Ashoka University, Sonapat, Haryana, India,  
13 131029

14 3 Present Address: School of Education, Azim Premji University, Bengaluru, Karnataka,  
15 India, 562125

16 4 Present Address: Department of Biology, Washington University, St. Louis, MO, USA,  
17 63130

18

19 **\*Corresponding author:**

20 Sutirth Dey  
21 Professor, Biology Division  
22 Indian Institute of Science Education and Research, Pune  
23 Dr. Homi Bhabha Road, Pune, Maharashtra, India 411 008  
24 Tel: +91-20-25908054

25 Email: [s.dey@iiserpune.ac.in](mailto:s.dey@iiserpune.ac.in)

26

27

28

29

30 **Data Accessibility Statement:** Data will be deposited in Dryad if accepted.

31

32 **Abstract**

33 1. Environmental stress is one of the important causes of biological dispersal. At the same  
34 time, the process of dispersal itself can incur and/or increase susceptibility to stress for the  
35 dispersing individuals. Therefore, in principle, stress can serve as both a cause and a cost of  
36 dispersal.

37 2. Desiccation stress is an environmentally relevant stress faced by many organisms, known  
38 to shape their population dynamics and distribution. However, the potentially contrasting  
39 roles of desiccation stress as a cause and a cost of dispersal have not been investigated.  
40 Furthermore, while desiccation stress often affects organisms in a sex-biased manner, it is not  
41 known whether the desiccation-dispersal relationship varies between males and females.

42 3. We studied the role of desiccation stress as a cause and cost of dispersal in a series of  
43 experiments using *D. melanogaster* adults in two-patch dispersal setups. We were interested  
44 in knowing whether (a) dispersers are the individuals that are more susceptible to desiccation  
45 stress, (b) dispersers pay a cost in terms of reduced resistance to desiccation stress, (c)  
46 dispersal evolution alters the desiccation cost of dispersal, and (d) females pay a reproductive  
47 cost of dispersal. For this, we modulated the degree of desiccation stress faced by the flies as  
48 well as the provision of rest following a dispersal event.

49 4. Our data showed that desiccation stress served as a significant cause of dispersal in both  
50 sexes. Further investigation revealed an increase in both male and female dispersal propensity  
51 with increasing desiccation duration. Next, we found a male-biased cost of dispersal in terms  
52 of reduced desiccation resistance. This trend was preserved in dispersal-selected and non-  
53 selected controls as well, where the desiccation cost of dispersal in females was very low  
54 compared to the males. Finally, we found that the females instead paid a significant  
55 reproductive cost of dispersal.

56 5. Our results highlight the complex relationship between desiccation stress and dispersal,  
57 whereby desiccation resistance can show both a positive and a negative association with  
58 dispersal. Furthermore, the sex differences observed in these trait associations may translate  
59 into differences in movement patterns, thereby giving rise to sex-biased dispersal.

60

61 **Keywords:** Dispersal propensity, desiccation resistance, life history, dispersal syndrome,  
62 fecundity, movement ecology, dispersal evolution, spatial selection

63

64 **1. Introduction**

65 Biological dispersal is often driven by numerous biotic and abiotic causes that promote  
66 movement across space (Matthysen 2012). However, the very process of movement can be  
67 costly to the dispersing organisms in several ways (Bonte *et al.* 2012). Investigating the  
68 causes and costs of dispersal can therefore help understand the constraints faced by individual  
69 organisms (Ronce & Clobert 2012), as well as their potential effects on the population- and  
70 community-level consequences of dispersal (Bowler & Benton 2005).

71 Since dispersal is a key life-history trait in individuals (Bonte & Dahiriel 2017), one possible  
72 way to decipher its causes and costs is by studying its associations with other life-history and  
73 behavioural traits. Collectively known as a ‘dispersal syndrome’ (Ronce & Clobert 2012),  
74 these dispersal-trait associations have been documented in several taxa (Stevens *et al.* 2014;  
75 Legrand *et al.* 2016; Comte & Olden 2018; Tung *et al.* 2018a). While these trait correlations  
76 can help us understand the underlying physiological mechanisms and constraints of dispersal,  
77 they are often contingent on the study environment and population history. This is because  
78 trait associations change rapidly and significantly if the environment changes, or if the  
79 population undergoes evolutionary changes (Chippindale, Ngo & Rose 2003; Jessup &  
80 Bohannan 2008; Mishra *et al.* 2018a). Moreover, dispersal may be modulated by many  
81 causes at once (Matthysen 2012; Legrand *et al.* 2015), and incur several simultaneous costs to  
82 the individuals (Roff 1977; Gros, Hovestadt & Poethke 2008; Bonte *et al.* 2012). Taken  
83 together, this makes a thorough investigation of dispersal-trait associations difficult under  
84 natural conditions. Therefore, one possibility is to study populations with a known history  
85 under a simplified environment to understand how a particular trait association (and hence,  
86 the dispersal syndrome) is shaped.

87 Desiccation stress is one of the factors that can greatly influence dispersal. Not only is it one  
88 of the most commonly faced environmental stress for numerous taxa (Black & Pritchard  
89 2002; Holmstrup, Hedlund & Boriss 2002; Kranner *et al.* 2008; Holzinger & Karsten 2013),  
90 it is also one of the first signs of an unfavourable environment, as the stress due to lack of  
91 water sometimes precedes lack of other resources such as food (Karan & Parkash 1998;  
92 Hoffmann & Harshman 1999). Understandably, desiccation not only affects the physiology  
93 of individual organisms (e.g. Gibbs, Chippindale & Rose 1997; Folk & Bradley 2004;  
94 Bazinet *et al.* 2010), but is also an important determinant of species distributions (e.g.  
95 Kellermann *et al.* 2009; Rajpurohit, Nedved & Gibbs 2013). Furthermore, organisms'  
96 responses to desiccation stress are particularly important in the context of climate change and  
97 its biological implications (Hoffmann *et al.* 2003; Tuba, Slack & Stark 2011; Van  
98 Heerwaarden & Sgrò 2014). Given that dispersal often serves as the first line of defence  
99 against unfavourable environments for many taxa (Gerber & Kokko 2018; Riotte-Lambert &  
100 Matthiopoulos 2020), it is crucial to investigate the relationship between biological dispersal  
101 and desiccation stress.

102 Desiccation stress can potentially act as both a cause and a cost of dispersal. A high  
103 desiccation stress may drive individuals away from an area, while at the same time, the very  
104 process of movement can incur desiccation stress to the dispersers. Since males and females  
105 in sexually dimorphic species often differ in the amount of body resources and their  
106 partitioning along the survival-reproduction axis (Rantala & Roff 2007; Wilkin & Sheldon  
107 2009; Maklakov & Lummaa 2013), differences in their desiccation profiles are commonplace  
108 (Jill & Daniel 2003; Matzkin, Watts & Markow 2007; Lyons *et al.* 2014). Similarly, many  
109 species exhibit 'sex-biased dispersal', a possible reflection of asymmetric cost-benefit  
110 outcomes of dispersal between the sexes (Trochet *et al.* 2016; Li & Kokko 2019). While the  
111 relationship among environmental stress, dispersal and sex have been recently discussed

112 (Gerber & Kokko 2018), sex differences in the dispersal-desiccation relationship have  
113 typically not been studied. This is not surprising given that, investigations into sex  
114 differences in dispersal syndromes are relatively rare in the dispersal literature (but see  
115 Legrand *et al.* 2016; Mishra *et al.* 2018a). The presence of pervasive sex differences in the  
116 life-history and behaviour literature leads us to anticipate some sex differences in the  
117 relationship between dispersal and desiccation stress as well. Especially in terms of dispersal  
118 costs, it would be interesting to see how the desiccation stress incurred during movement  
119 compares with other dispersal-related fitness costs such as female fecundity (Roff &  
120 Fairbairn 2007; Guerra 2011).

121 Here, we investigate the relationship between desiccation stress and dispersal, as well as the  
122 associated sex differences, using populations of the common fruit fly (*Drosophila*  
123 *melanogaster*) under controlled environmental conditions. Interestingly, both a positive and a  
124 negative association of desiccation stress with dispersal has already been reported in *D.*  
125 *melanogaster* (Mishra *et al.* 2018a), thus making it a suitable system to delineate how the  
126 desiccation-dispersal relationship is shaped. Specifically, we asked the following questions:  
127 (1) Does desiccation stress act as a cause of dispersal in males and females? (2) Is desiccation  
128 stress a cost of dispersal in males and females? (3) Does dispersal evolution alter the  
129 desiccation cost of dispersal in either sex, and (4) Do females experience a fecundity cost of  
130 dispersal? Our results showed that desiccation stress acts as a significant cause for dispersal  
131 for both sexes. However, desiccation stress emerged as a cost of dispersal largely in the  
132 males, and was not altered by dispersal evolution. Finally, while the females paid a negligible  
133 desiccation cost of dispersal, they experienced a significant cost of dispersal in terms of their  
134 fecundity. We discuss these results in the context of *Drosophila* physiology, along with their  
135 implications for dispersal patterns.

136

## 137 **2. Methods**

### 138 2.1 Fly populations

139 We used large, outbred laboratory populations (breeding size ~2400 individuals) of *D.*  
140 *melanogaster* for all the experiments in this study. The ancestry of these populations can be  
141 traced back to the IV lines, which were wild-caught in South Amherst, MA, USA (Ives  
142 1970). The single-generation experiments in this study were conducted using a baseline  
143 population named DB<sub>4</sub> (Sah, Salve & Dey 2013; Mishra *et al.* 2020). In addition, we used  
144 four dispersal-selected populations (namely, VB<sub>1-4</sub>) and their corresponding controls, the non-  
145 selected populations (VBC<sub>1-4</sub>), for one experiment. Due to the ongoing selection for higher  
146 dispersal every generation, the VB populations have evolved a higher dispersal propensity  
147 and ability (Tung *et al.* 2018b), as well as lower desiccation resistance (Mishra *et al.* 2018a),  
148 compared with the VBC populations. All the populations were maintained in discrete-  
149 generation cycles under uniform environmental conditions of 25 °C temperature and 24-h  
150 light.

151

### 152 2.2 Dispersal setup

153 Following previous studies (Mishra *et al.* 2018a; Tung *et al.* 2018b), we used a two-patch  
154 dispersal setup for observing fly dispersal. Each dispersal setup comprised a *source* container,  
155 a *path* tube and a *destination* container (Fig. 1). In this setup, all the flies for a given  
156 treatment/group are first introduced into the *source* container, which opens into a transparent  
157 plastic tube (internal diameter ~1 cm) that serves as the *path*. The other end of the path tube  
158 leads into the *destination* container, thereby allowing the dispersal of flies from the *source* to  
159 the *destination* container through the *path*, for a fixed duration. Depending on the experiment,  
160 the size of the *source* and *destination* containers, as well as the length of the *path* tube, can be

161 customized. A single experiment typically involves multiple such dispersal setups,  
162 maintained under uniform environmental conditions. At the end of a dispersal run, these  
163 dispersal setups are dismantled, and the flies found in each part (*source/path/destination*) are  
164 used as per the experimental requirements.

165

## 166 2.3 Experiments

167 We carried out a series of experiments to address various questions related to causes and  
168 costs of dispersal. The protocols, type of data obtained and the statistical analyses are  
169 presented separately for each experiment below.

### 170 *2.3.1 Experiment 1: Desiccation stress as cause vs. cost of dispersal*

171 We first examined whether desiccation stress acts as a cause and emerges as a cost of  
172 dispersal in *D. melanogaster*. For this, we started with ~19,200 age-matched (12-day-old  
173 from egg collection) adult flies from the DB<sub>4</sub> population that were reared under identical  
174 conditions of *ad libitum* food and water. Cylindrical, translucent plastic containers (~1.5 L  
175 volume) were used as *source* and *destination*, along with a *path* length of 6 m, to assemble  
176 two-patch dispersal setups (described in section 2.2). Batches of the aforementioned DB<sub>4</sub>  
177 individuals were then introduced into eight such dispersal setups (~2400 individuals per  
178 setup) and allowed to disperse for 5 h. By modulating two factors, i.e. presence of agar-based  
179 food (banana-jaggery medium) in the *source* container, and the provision of rest to flies after  
180 the dispersal run, we devised three scenarios (Fig. 1A, see explanation in next paragraph): (a)  
181 *Cause* scenario, where we could identify whether desiccation stress was a cause of dispersal,  
182 (b) *Control* scenario, where desiccation stress was expected to be neither a cause nor a cost of  
183 dispersal, and (c) *Cost* scenario, where we could identify whether desiccation stress was a  
184 cost of dispersal (Fig. 1A). In each of the three scenarios, the flies that completed dispersal



185 from the *source* to the *destination* were termed as dispersers (D), whereas the flies that were  
186 found inside the *source* container were termed as non-dispersers (ND). The flies found in the  
187 path at the end of the dispersal run were not used in this experiment.

188 In the *Cause* scenario, there was no food or water in the *source*, making desiccation stress a  
189 likely driver of dispersal away from the source. After the dispersal event, we collected the  
190 ND and D flies separately and provided them a 2-day rest with *ad libitum* food and water, so  
191 that the D flies could recuperate any energy costs of dispersal run. Thereafter, we assayed  
192 200 ND and 200 D flies (100 males+100 females each) for their desiccation resistance  
193 (Supplementary Text S1.1), to assess whether they differed in terms of their inherent  
194 desiccation sensitivity (Fig. 1A: *Cause* scenario). Here the assumption is that the rest of 2  
195 days is sufficient to ameliorate any negative effects on desiccation sensitivity (similar to  
196 Mishra *et al.* 2018a).

197 In the *Control* scenario, we provided agar-based banana-jaggery medium in the *source*  
198 container during the dispersal run, thereby removing desiccation stress as a possible driver of  
199 dispersal. Similar to the *Cause* scenario, the dispersal event was followed by a 2-day rest to  
200 both ND and D flies, to offset any energy costs of dispersal (Fig. 1A: *Control* scenario).  
201 Subsequently, we compared the desiccation resistance of 200 ND and 200 D flies, to  
202 ascertain if there were any unaccounted-for differences between them, i.e. other than those  
203 detected in *Cause* and *Cost* scenarios.

204 The *Cost* scenario was complementary to the *Cause* scenario. Here, we provided banana-  
205 jaggery medium in the *source* container, thereby removing desiccation stress as a cause of  
206 dispersal, but did not allow any rest after dispersal. As above, we then compared the  
207 desiccation resistance of 200 ND and 200 D flies, with any difference attributed to the energy  
208 costs of dispersal (Fig. 1A: *Cost* scenario).

209 The statistical analyses for this experiment, as well as those described in subsequent sections,  
210 were carried out in R v4.0.3 (R Core Team 2020). Here, the desiccation data from  
211 Experiment 1 were analysed together in a single mixed-model GLM using the ‘lmer’ function  
212 from the ‘lme4’ package v1.1-25 (Bates *et al.* 2015), with *scenario* (*Cause/Control/Cost*),  
213 *dispersal* (ND/D) and *sex* (male/female) as the fixed factors. As the flies were assayed in  
214 single-sex groups of 10 individuals within a vial (Supplementary Text S1.1), we included *vial*  
215 *identity* (1–10) as a random factor that was nested within the *scenario* × *dispersal* × *sex*  
216 interaction. Following a Type III analysis of deviance to ascertain the significance of the  
217 fixed factors and their interactions in GLM via the ‘Anova’ function in ‘car’ package v3.0-10  
218 (Fox & Weisberg 2019), we carried out the relevant pairwise comparisons using the ‘pairs’  
219 function in the ‘emmeans’ package v1.5.2-1 (Lenth 2020). Cohen's d was used as a measure  
220 of effect size for significantly different pairs of means, with the effect interpreted as large,  
221 medium, and small for  $d \geq 0.8$ ,  $0.8 > d \geq 0.5$ , and  $d < 0.5$ , respectively (Cohen 1988).

222

### 223 2.3.2 Experiment 2: Effect of desiccation duration on dispersal

224 Here, we investigated how dispersal changes with the duration of desiccation stress. For this,  
225 we segregated age-matched (12-day-old from egg collection) DB<sub>4</sub> flies into multiple groups  
226 of 120 individuals (60 males + 60 females) that were subjected to varying durations of  
227 desiccation stress (0, 1, 2, 3, 4, and 5 h) before being subjected to dispersal assay in separate  
228 dispersal setups (Fig. 1B). The *source* here was a 100-mL glass flask without any food or  
229 water, the *path* length was 2 m, and the destination was a 250-mL plastic bottle. The dispersal  
230 assay lasted for 2 h. Following a previous protocol (Mishra *et al.* 2018b; Mishra, Chakraborty  
231 & Dey 2020; Mishra *et al.* 2020), the experiment was carried out over 10 consecutive days  
232 with a fresh set of age-matched flies every day. This allowed us to assay one replicate of

233 every desiccation treatment each day, yielding 10 replicates blocked by *day*. In total, 6000  
 234 flies (5 desiccation treatments  $\times$  2 sexes  $\times$  10 days  $\times$  60 flies treatment<sup>-1</sup> sex<sup>-1</sup> day<sup>-1</sup>) were  
 235 assayed for this experiment. From the dispersal assay, we collected data on dispersal  
 236 propensity (i.e. the fraction of flies that dispersed from the source: Friedenber 2003;  
 237 Supplementary Text S1.2). To account for any day-to-day micro-environmental variation, we  
 238 used *day* as a random blocking factor in the analysis. Therefore, the dispersal propensity data  
 239 were analysed in a mixed model binomial GLM (with logit link function) using the ‘glmer’  
 240 function from the ‘lme4’ package v1.1-25 (Bates *et al.* 2015), with *desiccation duration* (0, 1,  
 241 2, 3, 4, and 5 h) and *sex* (male and female) as fixed factors, and *day* (1–10) as the random  
 242 factor. Following analysis of deviance via ‘Anova’ function in ‘car’ package v3.0-10 (Fox &  
 243 Weisberg 2019), appropriate pairwise comparisons were carried out using the ‘pairs’ function  
 244 in ‘emmeans’ package v1.5.2-1 (Lenth 2020).

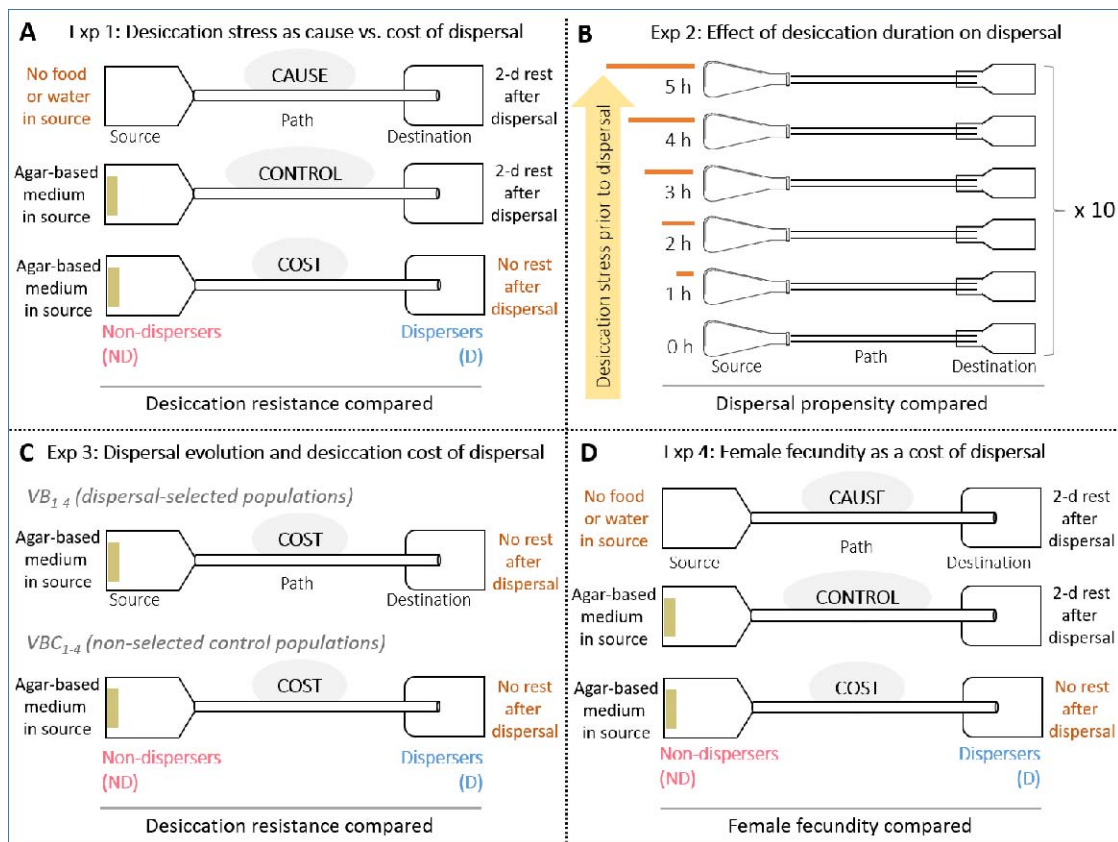

**Fig. 1: Schematics of the experimental design. (A)** Experiment 1 investigated the role of desiccation

stress as a cause vs. cost of dispersal. Using a *source-path-destination* setup, age-matched flies from an outbred baseline population (DB<sub>4</sub>) were segregated into non-dispersers (ND) and dispersers (D) under three scenarios: *Cause* (no food or water in *source*; rest provided after dispersal run), *Control* (agar-based banana-jaggery medium in *source*; rest provided after dispersal run), and *Cost* (agar-based banana-jaggery medium in *source*; no rest provided after dispersal run). ND and D flies within each scenario were then assayed for their desiccation resistance. **(B)** Experiment 2 further examined the role of desiccation stress as a cause of dispersal. Groups of age-matched flies from DB<sub>4</sub> population were subjected to different durations of desiccation stress (0–5 h) before being subjected to dispersal assay. **(C)** Experiment 3 investigated whether the desiccation cost of dispersal differs between populations selected for higher dispersal (VB<sub>1–4</sub>) and their non-selected controls (VBC<sub>1–4</sub>). Desiccation resistance of all eight population blocks was compared under the *Cost* scenario similar to Experiment 1. **(D)** Experiment 4 examined the role of female fecundity as a cause vs. cost of dispersal. Here, female ND and D flies for the three scenarios (*Cause*, *Control*, and *Cost*) were assayed for their fecundity.

245

### 246 2.3.3 Experiment 3: Dispersal evolution and desiccation cost of dispersal

247 Here, we used dispersal-selected populations (VB<sub>1–4</sub>), which have a higher dispersal  
248 propensity and travel longer distances (Tung *et al.* 2018b), as well as a lower desiccation  
249 resistance, than their non-selected controls (VBC<sub>1–4</sub>) (Mishra *et al.* 2018a). In this experiment,  
250 we investigated whether the VB and VBC populations differ in their desiccation cost of  
251 dispersal. This would help determine if selection for dispersal under desiccated conditions  
252 has altered the magnitude of proximate cost paid by dispersers. We subjected ~2400 age-  
253 matched individuals per population block (1–4) of each population type (VB/VBC) to  
254 segregation into ND and D individuals under the *Cost* scenario as described in section 2.3.1  
255 (Fig. 1C). Thereafter, we assayed 100 males and 100 females (in groups of 10  
256 individuals/vial) from each of the eight populations (VB<sub>1–4</sub> and VBC<sub>1–4</sub>) for their desiccation  
257 resistance (Supplementary Text S1.1). The entire desiccation resistance data were analysed  
258 using a mixed-model GLM with the ‘lmer’ function in ‘lme4’ package v1.1-25 (Bates *et al.*  
259 2015), with *dispersal selection* (VB/VBC), *dispersal* (ND/D) and *sex* (male/female) as fixed  
260 factors, and *population block* (1–4) and *vial identity* (1–10) as random factors. Here, *vial*  
261 *identity* was nested inside the *dispersal selection* × *dispersal* × *sex* × *population block* term.  
262 Following the GLM, we used the ‘Anova’ function in ‘car’ package v3.0-10 (Fox &

263 Weisberg 2019) for analysis of deviance, and subsequently, the ‘pairs’ function in ‘emmeans’  
264 package v1.5.2-1 (Lenth 2020) for relevant pairwise comparisons.

265

#### 266 *2.3.4 Experiment 4: Female fecundity as cause vs. cost of dispersal*

267 This experiment aimed to examine whether females paid a dispersal cost in terms of their  
268 fecundity. The female flies in this experiment were from the same ND and D groups of flies  
269 that were segregated in Experiment 1, giving rise to: (a) *Cause* scenario, defined by the lack  
270 of suitable oviposition site in *source* container, (b) *Control* scenario, with suitable oviposition  
271 surface (i.e. banana-jaggery medium) in the *source* and provision of rest after dispersal run,  
272 and (c) *Cost* scenario, where no rest is provided and flies were assayed for their fecundity  
273 immediately after dispersal (Fig. 1D). We counted the female fecundity as the number of  
274 eggs laid over a 12-h period, with the ND and D flies for each scenario assayed together (see  
275 Supplementary Text S1.3 for details). The entire fecundity data were analysed together with a  
276 quasi-Poisson GLM (with log link function) using the ‘glm’ function in ‘stats’ package v4.0.3  
277 (R Core Team 2020), with *scenario* (*Cause*, *Control*, and *Cost*) and *dispersal* (ND and D) as  
278 the fixed factors. As above, we used the ‘Anova’ function in ‘car’ package v3.0-10 (Fox &  
279 Weisberg 2019) for analysis of deviance, and the ‘pairs’ function in ‘emmeans’ package  
280 v1.5.2-1 (Lenth 2020) for relevant pairwise comparisons.

281

282

283 **3. Results**

284 3.1 Desiccation stress as a cause vs. cost of dispersal

285 Desiccation resistance data from Experiment 1 showed a significant *scenario* × *dispersal* ×  
286 *sex* interaction ( $\chi^2 = 7.20$ ,  $p = 0.027$ ). Analysis of pairwise differences for this interaction  
287 revealed a number of results (Supplementary Text S2.1). First, there was no difference in the  
288 desiccation resistance of dispersers vs. non-dispersers in the *Control* scenario ( $p_{\text{males}} = 0.16$ ;  
289  $p_{\text{females}} = 0.34$ ) (Fig. 2B, 2E). This was expected, as all these flies had access to *ad libitum*  
290 food and water in the source container, as well as a 2-day rest after the dispersal event.  
291 Second, dispersers in the *Cause* scenario had a lower desiccation resistance than non-  
292 dispersers ( $p_{\text{males}} = 0.006$ ,  $d = 1.63$  (large);  $p_{\text{females}} = 0.005$ ,  $d = 1.10$  (large)) (Fig. 2A, 2D).  
293 This implies that desiccation stress likely served as a cause of dispersal in both sexes. Third,  
294 while males experienced a cost of dispersal in terms of their desiccation resistance ( $p < 10^{-4}$ ,  
295  $d = 1.21$  (large)), no such cost was seen in females ( $p = 0.86$ ) (Fig. 2C, 2F).

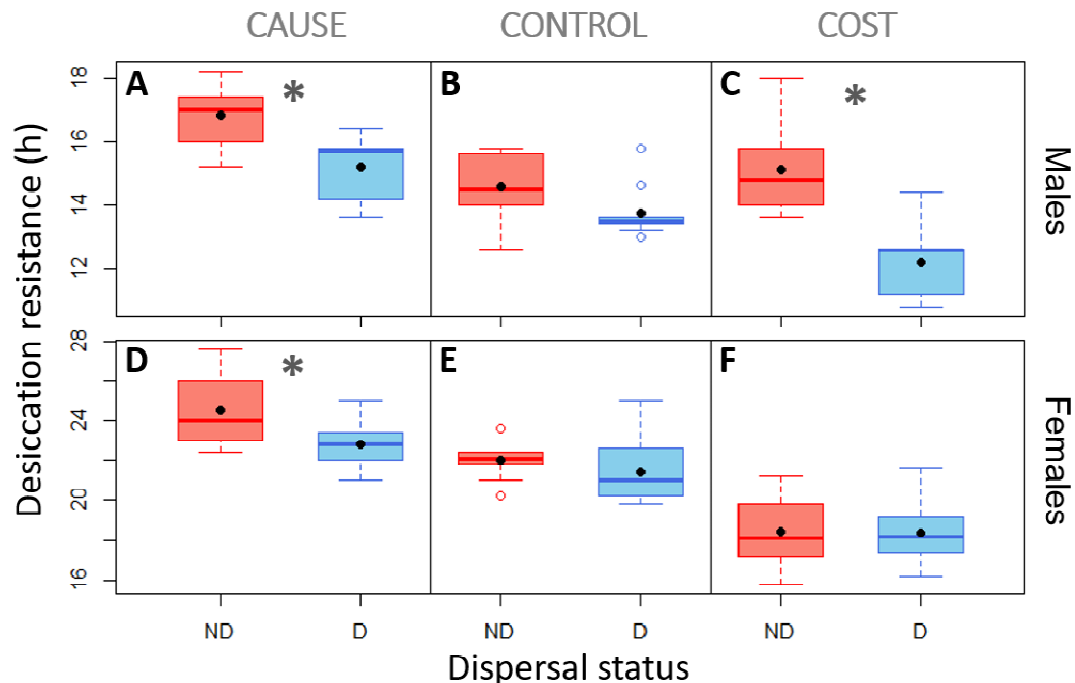

Fig. 2: Desiccation stress as cause vs. cost of dispersal (Experiment 1). Desiccation resistance for

non-disperser (ND) and disperser (D) flies from an outbred, baseline population (DB<sub>4</sub>), under three scenarios: *Cause*, *Control*, and *Cost*. Data for males and females are presented in the top and bottom rows, respectively. Edges of the boxplots represent 25<sup>th</sup> and 75<sup>th</sup> percentiles of the data. The black dots represent means and the lines inside box represent medians. Asterisks (\*) indicate a significant difference ( $p < 0.05$ ) between ND and D flies within a given panel. Note that the scales on Y-axis differ between the males and the females. See Supplementary Text S2.1 for the exact p values.

296

### 297 3.2 Desiccation stress as a cause of dispersal in both sexes

298 The role of desiccation stress as a cause of dispersal was further investigated in Experiment 2.

299 Analysis of data from this experiment revealed that the *desiccation duration* × *sex* interaction

300 was significant ( $\chi^2 = 17.10$ ,  $p = 0.004$ ), indicating an asymmetric effect of desiccation

301 duration on dispersal propensity of males and females. However, pairwise comparisons

302 revealed an increasing trend of dispersal propensity with longer durations of desiccation

303 stress in both sexes, with a somewhat greater effect observed in males (Fig. 3)

304 (Supplementary Text S2.2). Therefore, the results from both Experiments 1 and 2 suggested

305 that desiccation stress served as a cause of dispersal in both sexes, with longer durations of

306 desiccation leading to greater dispersal.

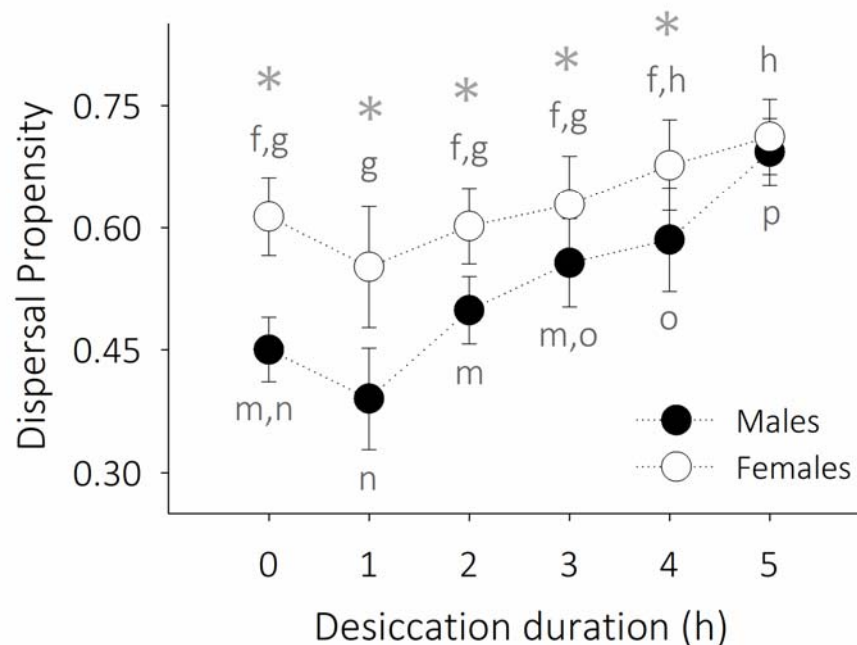

**Fig. 3: Effect of desiccation duration on dispersal propensity (Experiment 2).** Dispersal propensity ( $\pm$  SE) for age-matched flies from an outbred baseline population ( $DB_4$ ) subjected to desiccation stress for different durations (0–5 h). Each point represents the average of 10 replicates (each with 120 individuals). For a given sex, the changes in dispersal are examined by comparing the propensity means across the six desiccation durations (significant differences denoted using different lower-case letters: starting with m for males and f for females). Asterisks (\*) denote a significant difference in male and female dispersal for a given desiccation duration. See Supplementary Text S2.2 for the exact p values.

307

### 308 3.3 Desiccation stress as a sex-biased cost of dispersal

309 Next, we examined the role of desiccation stress as a cost of dispersal using four dispersal-

310 selected populations ( $VB_{1-4}$ ) and their corresponding non-selected controls ( $VBC_{1-4}$ )

311 (Experiment 3). Desiccation resistance data from this experiment revealed a significant

312 *dispersal*  $\times$  *sex* interaction ( $\chi^2 = 9.52$ ,  $p = 0.002$ ), with males experiencing a relatively larger

313 desiccation cost of dispersal ( $p < 10^{-4}$ ,  $d = 1.86$  (large)) (Fig. 4A, 4B) than females ( $p < 10^{-4}$ ,

314  $d = 0.42$  (small)) (Fig. 4C, 4D). Moreover, the *dispersal selection*  $\times$  *dispersal* ( $\chi^2 = 2.33$ ,  $p =$

315 0.13) and *dispersal selection*  $\times$  *dispersal*  $\times$  *sex* ( $\chi^2 = 0.19$ ,  $p = 0.66$ ) interactions were not

316 significant, indicating that this result was consistent for both control (VBC) and dispersal-

317 selected (VB) populations (Supplementary Text S2.3).



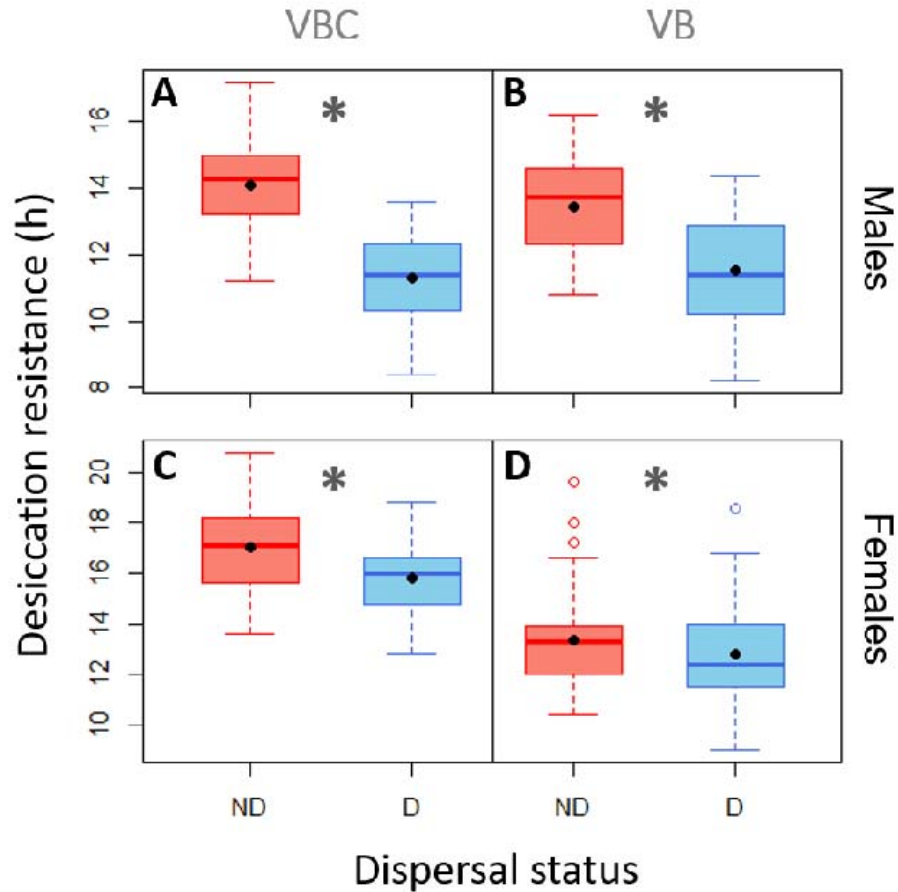

**Fig. 4: Dispersal evolution and desiccation cost of dispersal (Experiment 3).** Desiccation resistance of non-dispersers (ND) and dispersers (D) from VB<sub>1-4</sub> (dispersal-selected) and VBC<sub>1-4</sub> (control) populations. Data for males and females are presented in the top and bottom rows, respectively. Edges of the boxplots represent 25<sup>th</sup> and 75<sup>th</sup> percentiles of the data. Asterisks (\*) indicate a significant difference ( $p < 0.05$ ) between ND and D flies within a given panel. See Supplementary Text S2.3 for the exact p values.

318

319

### 320 3.4 Significant cost of dispersal for females in terms of fecundity

321 As minimal or no desiccation cost of dispersal was observed for females (Sections 3.1 and  
322 3.3), we investigated if there was a reproductive cost of dispersal for the females (Experiment  
323 4). Analysis of the female fecundity data from this experiment (presented in Supplementary  
324 Text S2.4) revealed a significant *scenario*  $\times$  *dispersal* interaction ( $\chi^2 = 17.90$ ,  $p = 0.0001$ ).  
325 Pairwise comparisons for this interaction revealed no significant difference between  
326 dispersers and non-dispersers under the *Control* ( $p = 0.63$ ) (Fig. 5B) and *Cause* ( $p = 0.16$ )

327 scenarios (Fig. 5A), but a significant difference in the *Cost* scenario: disperser females had a  
328 lower fecundity than non-disperser females ( $p = 0.0001$ ,  $d = 0.68$  (medium)) (Fig. 5C).  
329 Therefore, we concluded that female flies pay a cost of dispersal in terms of their fecundity.

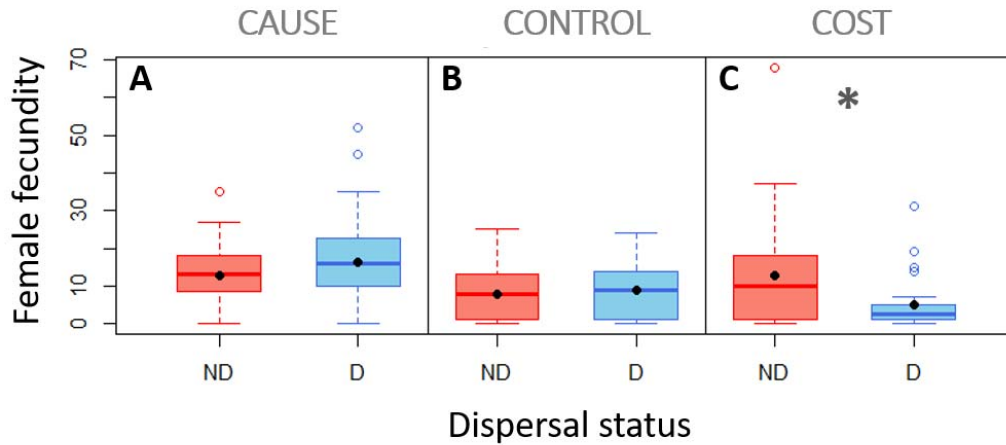

**Fig. 5: Female fecundity as cause vs. cost of dispersal (Experiment 4).** Female fecundity for non-disperser (ND) and disperser (D) flies from an outbred, baseline population ( $DB_4$ ), under three scenarios: *Cause*, *Control*, and *Cost*. Edges of the boxplots represent 25<sup>th</sup> and 75<sup>th</sup> percentiles of the data. Asterisks (\*) indicate a significant difference ( $p < 0.05$ ) between ND and D flies within a given panel. See Supplementary Text S2.4 for the exact  $p$  values.

330

331

## 332 **4. Discussion**

### 333 4.1 Desiccation stress as a cause of dispersal in both sexes

334 Environmental stress, among other things, can serve as a major cause of biological dispersal.  
335 At the same time, the very process of dispersal can be stressful to individuals. When  
336 monitored after a dispersal event, the stress-resistance ability of organisms are often found to  
337 be lower (Graves *et al.* 1992). This decrease can come about in three different ways. First, the  
338 dispersers might be the ones that were more susceptible to the stress, and hence they  
339 dispersed. Second, even if the stress resistance of the dispersers is inherently similar to that of  
340 the non-dispersers, the energy spent in the act of dispersal reduces the stress-resistance ability  
341 of the former. Third, it might be an interaction of the above two scenarios. Unfortunately,  
342 these questions are very difficult to answer, particularly when there is no *a priori* way of  
343 distinguishing between a disperser and a non-disperser. Here, we investigated this complex  
344 relationship, using desiccation as the type of stress and fruit flies as a model system. Our  
345 experimental design allowed us to explicitly control for other confounds when a particular  
346 aspect of the desiccation-dispersal relationship was being examined.

347 To begin with, Experiment 1 revealed that the disperser (D) flies had a lower desiccation  
348 resistance than the non-disperser (ND) flies under the *Cause* scenario (Figs. 2A and 2D).  
349 Comparing the results with the *Control* scenario, which showed no difference between ND  
350 and D flies (Figs. 2B and 2E), we could conclude that desiccation stress indeed served as a  
351 significant driver of dispersal for both male and female flies. This is in line with the  
352 expectation from literature that dispersal is one of the foremost ways for escaping  
353 unfavourable conditions (Gerber & Kokko 2018), not only in animal taxa (Cremer & Heinze  
354 2003; Riotte-Lambert & Matthiopoulos 2020) but also in plants (Martorell &  
355 Martínez-López 2014). While this is not a surprising result, our study demonstrates it

356 explicitly using a unique setup, where we were able to control for the possible confound of  
357 desiccation as a cost of dispersal (Fig. 1A).

358 Going a step further, we demonstrate in Experiment 2 how *Drosophila* dispersal changes with  
359 increasing desiccation stress (Fig. 3). Given that desiccation resistance is highly correlated  
360 with glycogen content in fruit flies (Gibbs, Chippindale & Rose 1997), one might have  
361 expected a decrease in dispersal at longer desiccation durations, where the flies likely faced a  
362 severe depletion of their glycogen reserves (Folk & Bradley 2004; Bazinet *et al.* 2010).

363 Surprisingly however, this was not the case in Experiment 2, where flies of both sexes  
364 showed a nearly monotonic increase in their dispersal propensity with increasing desiccation  
365 stress (Fig 3). This means that, at least for the duration of desiccation stress (up to 5 h)  
366 imposed in Experiment 2, the flies were in a state to successfully initiate dispersal. However,  
367 as a corollary, it also means that organisms likely do not disperse until the stress turns acute,  
368 which may make them more susceptible to dispersal-related risks and costs (see Section 4.2).  
369 It is possible that this delay in emigration could be a function of how long it takes to initiate  
370 the stress physiological response. Overall, we speculate that the ability to perceive stress  
371 would play a role in shaping the dispersal-mediated escape response from stressful habitats.

372 Since dispersal is also known to incur various costs (reviewed in Bonte *et al.* 2012), the  
373 process of dispersal itself can induce stress or increase the susceptibility of dispersing  
374 individuals to stress. We explored the potential desiccation cost of dispersal using the *Cost*  
375 scenario, in Experiments 1 and 3.

#### 376 4.2 Sex-biased cost of dispersal in terms of desiccation stress

377 Given that active dispersal involves expenditure of energy, it is likely that flies spend a part  
378 of their glycogen reserves during dispersal (Graves *et al.* 1992), which can reduce their  
379 desiccation resistance following a dispersal event. Experiment 1 confirmed a cost of dispersal

380 in terms of their desiccation resistance, although it was not symmetric between the two sexes.  
381 A significant desiccation cost of dispersal was observed for males (Fig. 2C) but not for  
382 females (Fig. 2F) in the DB<sub>4</sub> population. Similarly, Experiment 3 revealed that the  
383 desiccation cost of dispersal was much higher in males (Fig. 4A, 4B) than in females (Fig.  
384 4C, 4D) (see section 3.3 for the exact effect sizes). As both dispersal-selected (VB) and non-  
385 selected control (VBC) flies showed a male-biased desiccation cost, we concluded that the  
386 evolution of dispersal did not alter the immediate desiccation cost of dispersal between these  
387 populations.

388 A potential explanation for the sex bias in desiccation cost is the sexual dimorphism in body  
389 size and desiccation resistance of *D. melanogaster* adults. A positive association between  
390 desiccation resistance and body size is well documented in adult fruit flies (Parsons 1970;  
391 Clark & Doane 1983). Given that female fruit flies are typically larger than their male  
392 counterparts, they typically tend to have a higher desiccation resistance as well (Gibbs,  
393 Chippindale & Rose 1997; Matzkin, Watts & Markow 2007; Mishra *et al.* 2018a). As a  
394 result, the females likely had greater resources to begin with, which allowed them to  
395 successfully undertake dispersal without paying a high desiccation cost. This is also  
396 congruent with the observation that dispersal evolution has not led to a change in the body  
397 size of VB females relative to their VBC controls (Mishra *et al.* 2018a; Tung *et al.* 2018a).

398 It is possible that the dispersal cost for females manifests not in terms of their somatic  
399 maintenance (here, desiccation resistance), but instead their reproductive potential. This is in  
400 line with the results of several life-history studies on trade-offs that show a reproductive cost  
401 instead of somatic costs in females (Miyatake 1997; Ghalambor & Martin 2001; Djawdan *et*  
402 *al.* 2004; Muller-Landau 2010). In such cases, female fecundity is often one of the first traits  
403 to exhibit this cost. Given the energy-intensive nature of active dispersal (as evidenced by the

404 dispersal cost borne by males in this study), female fecundity could show a cost of dispersal.

405 Therefore, we next investigated the association between female fecundity and dispersal.

#### 406 4.3 Fecundity cost of dispersal for female flies

407 The relationship between dispersal and fecundity varies across taxa. A negative association

408 between dispersal and fecundity has been reported in several wing-dimorphic insects

409 (reviewed in Guerra 2011), wing-monomorphic insects (reviewed in Tigreros & Davidowitz

410 2019), as well as other taxa such as *C. elegans* (Friedenberg 2003). These results are typically

411 explained as a developmental or energetic cost of dispersal in terms of fecundity. In contrast,

412 a positive association between dispersal and fecundity has been observed in many

413 mammalian taxa (reviewed in Stevens *et al.* 2014). Here, the typical explanation is twofold.

414 First, individuals with better body condition, including higher fecundity, could be better able

415 to complete dispersal. Second, high fecundity could lead to high dispersal via increased kin

416 competition in a given habitat. Of course, it is also possible that the dispersal-fecundity

417 relationship, like other dispersal-trait associations, is modulated by the environmental context

418 (e.g. Legrand *et al.* 2016; Mishra *et al.* 2018a). For instance, the fecundity cost of dispersal

419 may be particularly strong under limiting resources. Similarly, the positive association

420 between dispersal and fecundity might be altered by the population density and level of

421 resources in the originating patch (e.g. Einum, Sundt-Hansen & H. Nislow 2006). Therefore,

422 experiments under controlled conditions, which can take the ecological context into account,

423 can provide important insights into the relationship between fecundity and dispersal.

424 Experiment 4 revealed that, while there was no difference under the *Cause* and *Control*

425 scenarios, D females had a significantly lower fecundity than ND flies in the *Cost* scenario

426 (Fig. 5). What makes our result interesting is that females showed a fecundity cost before the

427 somatic cost of dispersal, at least in terms of desiccation resistance (*cf.* Figs. 2F and FC). A

428 plausible explanation for this is that, under stressful conditions, individuals may prioritize  
429 survival over potential reproduction. This has been observed in other life-history traits as  
430 well, where allocation of resources into somatic maintenance can, at times, take priority over  
431 reproductive investment (Djawdan *et al.* 2004; Muller-Landau 2010; Martorell &  
432 Martínez-López 2014). In particular, given that dispersal is a key life-history trait (Bonte &  
433 Dahirel 2017) with several potential costs (Bonte *et al.* 2012), the fecundity trade-off  
434 observed here is in line with the observations for other wing-monomorphic insects (Tigreros  
435 & Davidowitz 2019).

436

#### 437 4.4. Implications

438 Our results revealed desiccation as a cause of dispersal for both sexes in *Drosophila*  
439 *melanogaster*, and dispersal propensity of both male and female flies increased with  
440 increasing desiccation duration. In addition, we observed a male-biased cost of dispersal in  
441 terms of desiccation resistance, while the female flies paid a fecundity cost of dispersal. We  
442 discuss some implications of our results below.

443 First, these results demonstrate that the relationship between stress and dispersal is likely  
444 complicated. On one hand, stress is likely to drive dispersal of individuals away from an area.  
445 On the other hand, dispersing individuals incur a further cost of dispersal in terms of  
446 increased stress. Therefore, early dispersers from a population may be the least stress-tolerant  
447 individuals. In contrast, highly stress-tolerant individuals could delay emigration in response  
448 to a stress. As a result, if dispersal occurs across habitats with high connectivity, stress-  
449 intolerant individuals may have the highest dispersal propensity (e.g. Fig. 3). However, if the  
450 inter-habitat connectivity is poor, only the relatively stress-resistant individuals in a

451 population would be able to undertake dispersal successfully by surviving the large dispersal  
452 costs.

453 Second, sex differences in the somatic costs of dispersal may effectively lead to instances of  
454 sex-biased dispersal, even if a similar number of male and female individuals emigrate from a  
455 given area. This is because the stress-sensitive sex (e.g. males in the current study) may not  
456 be able to complete dispersal as successfully as the stress-resistant sex (here, females). As a  
457 result, in the species where mating occurs after a dispersal event, such differences can lead to  
458 a skew in the local sex ratio of the dispersed population and consequently mate limitation.  
459 Moreover, the sex-biased nature of dispersal costs can result in demographic consequences  
460 through dispersal syndromes (Mishra *et al.* 2018a; Shaw, Kokko & Neubert 2018). For  
461 instance, if the fecundity of immigrant females in a new area is reduced as a consequence of  
462 dispersal, then they may not be able to compete with the resident females in that area. As a  
463 result, the apparent prioritization of fitness cost over somatic cost in females, as observed  
464 here, can hamper their settlement ability in a new habitat.

465 Finally, while dispersal is often considered an effective escape route against environmental  
466 stress (Boeye *et al.* 2013; Travis *et al.* 2013), it might not be enough to offset the fitness  
467 reduction caused by changing climatic conditions (Buckley, Tewksbury & Deutsch 2013).  
468 The situation might worsen further with dispersal-associated costs that hamper the stress-  
469 handling ability of individuals and their biological fitness (Cheptou *et al.* 2008).  
470 Consequently, there is a need to incorporate information on the physiological condition of  
471 dispersers in models that consider dispersal as a mode of escape from stressful habitats.

472

473



474 **Acknowledgements**

475 We thank Mohammed Aamir Sadiq and Sahana Srivathsa for help with the experiments. AM  
476 and ST were supported by a Senior Research Fellowship from the Council of Scientific and  
477 Industrial Research, Government of India. VRSS was supported through the GE Foundation  
478 Scholar Leaders Program. PMS was supported through the INSPIRE fellowship of  
479 Department of Science and Technology (DST), Government of India. This study was  
480 supported by a research grant (#CRG/2018/001333) from Science and Engineering Research  
481 Board, DST, Government of India, and internal funding from IISER-Pune.

482

483 **Authors' Contributions**

484 AM and SD conceived the ideas and designed methodology; AM, ST, VRSS and PMS  
485 collected the data; AM analyzed the data; AM and SD led the writing of the manuscript. All  
486 authors contributed critically to the drafts and gave final approval for publication.

487

488 **REFERENCES**

- 489 Bates, D., Mächler, M., Bolker, B. & Walker, S. (2015) Fitting Linear Mixed-Effects Models  
490 Using lme4. *Journal of Statistical Software*, **67**, 1-48.
- 491 Bazinet, A.L., Marshall, K.E., MacMillan, H.A., Williams, C.M. & Sinclair, B.J. (2010)  
492 Rapid changes in desiccation resistance in *Drosophila melanogaster* are facilitated by  
493 changes in cuticular permeability. *Journal of Insect Physiology*, **56**, 2006-2012.
- 494 Black, M. & Pritchard, H.W. (2002) *Desiccation and survival in plants: drying without*  
495 *dying*. Cabi.
- 496 Boeye, J., Travis, J.M.J., Stoks, R. & Bonte, D. (2013) More rapid climate change promotes  
497 evolutionary rescue through selection for increased dispersal distance. *Evolutionary*  
498 *Applications*, **6**, 353-364.
- 499 Bonte, D. & Doherty, M. (2017) Dispersal: a central and independent trait in life history.  
500 *Oikos*, **126**, 472-479.
- 501 Bonte, D., Van Dyck, H., Bullock, J., Coulon, A., Delgado, M., Gibbs, M., Lehouck, V.,  
502 Matthysen, E., Mustin, K., Saastamoinen, M. & Schtickzelle, N. (2012) Costs of  
503 dispersal. *Biological Reviews*, **87**, 290-312.
- 504 Bowler, D.E. & Benton, T.G. (2005) Causes and consequences of animal dispersal strategies:  
505 relating individual behaviour to spatial dynamics. *Biological Reviews*, **80**, 205-225.
- 506 Buckley, L.B., Tewksbury, J.J. & Deutsch, C.A. (2013) Can terrestrial ectotherms escape the  
507 heat of climate change by moving? *Proceedings of the Royal Society B: Biological*  
508 *Sciences*, **280**, 20131149.
- 509 Cheptou, P.O., Carrue, O., Rouifed, S. & Cantarel, A. (2008) Rapid evolution of seed  
510 dispersal in an urban environment in the weed *Crepis sancta*. *Proceedings of the*  
511 *National Academy of Sciences*, **105**, 3796-3799.
- 512 Chippindale, A.K., Ngo, A.L. & Rose, M.R. (2003) The devil in the details of life-history  
513 evolution: instability and reversal of genetic correlations during selection  
514 on *Drosophila* development. *Journal of genetics*, **82**, 133-145.
- 515 Clark, A. & Doane, W. (1983) Desiccation tolerance of the adipose60 mutant of *Drosophila*  
516 *melanogaster*. *Hereditas*, **99**, 165-175.
- 517 Cohen, J. (1988) *Statistical Power Analysis for the Behavioral Sciences*. Lawrence Erlbaum  
518 Associates, USA.
- 519 Comte, L. & Olden, J. (2018) Evidence for dispersal syndromes in freshwater fishes.  
520 *Proceedings of the Royal Society of London, Series B: Biological Sciences*, **285**,  
521 20172214.
- 522 Cremer, S. & Heinze, J. (2003) Stress grows wings: environmental induction of winged  
523 dispersal males in *Cardiocondyla* ants. *Current Biology*, **13**, 219-223.
- 524 Djawdan, M., Sugiyama, T.T., Schlaeger, L.K., Bradley, T.J. & Rose, M.R. (2004) Metabolic  
525 aspects of the trade-off between fecundity and longevity in *Drosophila melanogaster*.  
526 *Methuselah Flies: A Case Study in the Evolution of Aging*, pp. 145-164. World  
527 Scientific.
- 528 Einum, S., Sundt-Hansen, L. & Nislow, K. (2006) The partitioning of density-dependent  
529 dispersal, growth and survival throughout ontogeny in a highly fecund organism.  
530 *Oikos*, **113**, 489-496.
- 531 Folk, D.G. & Bradley, T.J. (2004) The evolution of recovery from desiccation stress in  
532 laboratory-selected populations of *Drosophila melanogaster*. *Journal of Experimental*  
533 *Biology*, **207**, 2671-2678.
- 534 Fox, J. & Weisberg, S. (2019) *An R Companion to Applied Regression, Third Edition*. Sage,  
535 Thousand Oaks CA. <https://socialsciences.mcmaster.ca/jfox/Books/Companion/>.

- 536 Friedenber, N.A. (2003) Experimental evolution of dispersal in spatiotemporally variable  
537 microcosms. *Ecology Letters*, **6**, 953-959.
- 538 Gerber, N. & Kokko, H. (2018) Abandoning the ship using sex, dispersal or dormancy:  
539 multiple escape routes from challenging conditions. *Philosophical Transactions of the*  
540 *Royal Society B: Biological Sciences*, **373**, 20170424.
- 541 Ghalambor, C.K. & Martin, T.E. (2001) Fecundity-survival trade-offs and parental risk-  
542 taking in birds. *Science*, **292**, 494-497.
- 543 Gibbs, A.G., Chippindale, A.K. & Rose, M.R. (1997) Physiological mechanisms of evolved  
544 desiccation resistance in *Drosophila melanogaster*. *Journal of Experimental Biology*,  
545 **200**, 1821-1832.
- 546 Graves, J.L., Toolson, E.C., Jeong, C., Vu, L.N. & Rose, M.R. (1992) Desiccation, Flight,  
547 Glycogen, and Postponed Senescence in *Drosophila melanogaster*. *Physiological*  
548 *Zoology*, **65**, 268-286.
- 549 Gros, A., Hovestadt, T. & Poethke, H.J. (2008) Evolution of sex-biased dispersal: the role of  
550 sex-specific dispersal costs, demographic stochasticity, and inbreeding. *Ecological*  
551 *Modelling*, **219**, 226-233.
- 552 Guerra, P. (2011) Evaluating the life-history trade-off between dispersal capability and  
553 reproduction in wing dimorphic insects: a meta-analysis. *Biological Reviews*, **86**,  
554 813-835.
- 555 Hoffmann, A.A., Hallas, R.J., Dean, J.A. & Schiffer, M. (2003) Low potential for climatic  
556 stress adaptation in a rainforest *Drosophila* species. *Science*, **301**, 100-102.
- 557 Hoffmann, A.A. & Harshman, L.G. (1999) Desiccation and starvation resistance in  
558 *Drosophila*: patterns of variation at the species, population and intrapopulation levels.  
559 *Heredity*, **83**, 637-643.
- 560 Holmstrup, M., Hedlund, K. & Boriss, H. (2002) Drought acclimation and lipid composition  
561 in *Folsomia candida*: implications for cold shock, heat shock and acute desiccation  
562 stress. *Journal of Insect Physiology*, **48**, 961-970.
- 563 Holzinger, A. & Karsten, U. (2013) Desiccation stress and tolerance in green algae:  
564 consequences for ultrastructure, physiological and molecular mechanisms. *Frontiers*  
565 *in plant science*, **4**, 327.
- 566 Ives, P.T. (1970) Further genetic studies of the South Amherst population of *Drosophila*  
567 *melanogaster*. *Evolution*, **24**, 507-518.
- 568 Jessup, C. & Bohannan, B. (2008) The shape of an ecological trade-off varies with  
569 environment. *Ecology Letters*, **11**, 947-959.
- 570 Jill, D. & Daniel, R.F. (2003) The effects of size, sex, and reproductive condition on thermal  
571 and desiccation stress in a riparian spider (*Pirata sedentarius*, Araneae, Lycosidae).  
572 *The Journal of Arachnology*, **31**, 278-284.
- 573 Karan, D. & Parkash, R. (1998) Desiccation tolerance and starvation resistance exhibit  
574 opposite latitudinal clines in Indian geographical populations of *Drosophila kikkawai*.  
575 *Ecological Entomology*, **23**, 391-396.
- 576 Kellermann, V., Van Heerwaarden, B., Sgrò, C.M. & Hoffmann, A.A. (2009) Fundamental  
577 evolutionary limits in ecological traits drive *Drosophila* species distributions. *Science*,  
578 **325**, 1244-1246.
- 579 Kranner, I., Beckett, R., Hochman, A. & Nash Iii, T.H. (2008) Desiccation-tolerance in  
580 lichens: a review. *The Bryologist*, 576-593.
- 581 Legrand, D., Larranaga, N., Bertrand, R., Ducatez, S., Calvez, O., Stevens, V.M. & Baguette,  
582 M. (2016) Evolution of a butterfly dispersal syndrome. *Proceedings of the Royal*  
583 *Society of London, Series B: Biological Sciences*, **283**, 20161533.

- 584 Legrand, D., Trochet, A., Moulherat, S., Calvez, O., Stevens, V.M., Ducatez, S., Clobert, J. &  
585 Baguette, M. (2015) Ranking the ecological causes of dispersal in a butterfly.  
586 *Ecography*, **38**, 822-831.
- 587 Lenth, R. (2020) emmeans: Estimated Marginal Means, aka Least-Squares Means. *R package*  
588 *version 1.5.2-1*. <https://CRAN.R-project.org/package=emmeans>.
- 589 Li, X.Y. & Kokko, H. (2019) Sex-biased dispersal: a review of the theory. *Biological*  
590 *Reviews*, **94**, 721-736.
- 591 Lyons, C.L., Coetzee, M., Terblanche, J.S. & Chown, S.L. (2014) Desiccation tolerance as a  
592 function of age, sex, humidity and temperature in adults of the African malaria  
593 vectors *Anopheles arabiensis* and *Anopheles funestus*. *Journal of Experimental*  
594 *Biology*, **217**, 3823-3833.
- 595 Maklakov, A.A. & Lummaa, V. (2013) Evolution of sex differences in lifespan and aging:  
596 Causes and constraints. *Bioessays*, **35**, 717-724.
- 597 Martorell, C. & Martínez-López, M. (2014) Informed dispersal in plants: *Heterosperma*  
598 *pinnatum* (Asteraceae) adjusts its dispersal mode to escape from competition and  
599 water stress. *Oikos*, **123**, 225-231.
- 600 Matthysen, E. (2012) Multicausality of dispersal: a review. *Dispersal ecology and evolution*,  
601 pp. 3-18. Oxford University Press.
- 602 Matzkin, L., Watts, T.D. & Markow, T.A. (2007) Desiccation Resistance in Four *Drosophila*  
603 Species: Sex and Population Effects. *Fly*, **1**, 268-273.
- 604 Mishra, A., Chakraborty, P.P. & Dey, S. (2020) Dispersal evolution diminishes the negative  
605 density dependence in dispersal. *Evolution*, **74**, 2149-2157.
- 606 Mishra, A., Tung, S., Shreenidhi, P.M., Sadiq, M.A., Sruti, V.R.S., Chakraborty, P.P. & Dey,  
607 S. (2018a) Sex differences in dispersal syndrome are modulated by environment and  
608 evolution. *Philosophical Transactions of the Royal Society of London, Series B:*  
609 *Biological Sciences*, **373**, 20170428.
- 610 Mishra, A., Tung, S., Sruti, V., Srivathsa, S. & Dey, S. (2020) Mate-finding dispersal reduces  
611 local mate limitation and sex bias in dispersal. *Journal of Animal Ecology*, **89**, 2089-  
612 2098.
- 613 Mishra, A., Tung, S., Sruti, V.R.S., Sadiq, M.A., Srivathsa, S. & Dey, S. (2018b) Pre-  
614 dispersal context and presence of opposite sex modulate density dependence and sex  
615 bias of dispersal. *Oikos*, **127**, 1596-1604.
- 616 Miyatake, T. (1997) Genetic trade-off between early fecundity and longevity in *Bactrocera*  
617 *cucurbitae* (Diptera: Tephritidae). *Heredity*, **78**, 93-100.
- 618 Muller-Landau, H.C. (2010) The tolerance–fecundity trade-off and the maintenance of  
619 diversity in seed size. *Proceedings of the National Academy of Sciences*, **107**, 4242-  
620 4247.
- 621 Parsons, P. (1970) Genetic heterogeneity in natural populations of *Drosophila melanogaster*  
622 for ability to withstand desiccation. *Theoretical and Applied Genetics*, **40**, 261-266.
- 623 R Core Team (2020) R: A language and environment for statistical computing. *R*  
624 *Foundation for Statistical Computing, Vienna, Austria*. URL [https://www.R-](https://www.R-project.org)  
625 [project.org](https://www.R-project.org).
- 626 Rajpurohit, S., Nedved, O. & Gibbs, A.G. (2013) Meta-analysis of geographical clines in  
627 desiccation tolerance of Indian drosophilids. *Comparative Biochemistry and*  
628 *Physiology Part A: Molecular & Integrative Physiology*, **164**, 391-398.
- 629 Rantala, M.J. & Roff, D.A. (2007) Inbreeding and extreme outbreeding cause sex differences  
630 in immune defence and life history traits in *Epirrita autumnata*. *Heredity*, **98**, 329-336.
- 631 Riotte-Lambert, L. & Matthiopoulos, J. (2020) Environmental predictability as a cause and  
632 consequence of animal movement. *Trends in Ecology & Evolution*, **35**, 163-174.

- 633 Roff, D. (1977) Dispersal in dipterans: its costs and consequences. *Journal of Animal*  
634 *Ecology*, **46**, 443-456.
- 635 Roff, D.A. & Fairbairn, D.J. (2007) The Evolution and Genetics of Migration in Insects.  
636 *Bioscience*, **57**, 155-164.
- 637 Ronce, O. & Clobert, J. (2012) Dispersal syndromes. *Dispersal ecology and evolution*, pp.  
638 119-138. Oxford University Press.
- 639 Sah, P., Salve, J.P. & Dey, S. (2013) Stabilizing biological populations and metapopulations  
640 through Adaptive Limiter Control. *Journal of Theoretical Biology*, **320**, 113-123.
- 641 Shaw, A.K., Kokko, H. & Neubert, M.G. (2018) Sex difference and Allee effects shape the  
642 dynamics of sex-structured invasions. *Journal of Animal Ecology*, **87**, 36-46.
- 643 Stevens, V., Whitmee, S., Galliard, L., Clobert, J., Böhning-Gaese, K., Bonte, D., Brändle,  
644 M., Matthias Dehling, D., Hof, C., Trochet, A. & Baguette, M. (2014) A comparative  
645 analysis of dispersal syndromes in terrestrial and semi-terrestrial animals. *Ecology*  
646 *Letters*, **17**, 1039-1052.
- 647 Tigreros, N. & Davidowitz, G. (2019) *Flight-fecundity tradeoffs in wing-monomorphic*  
648 *insects*.
- 649 Travis, J., Delgado, M., Bocedi, G., Baguette, M., Bartoń, K., Bonte, D., Boulangeat, I.,  
650 Hodgson, J., Kubisch, A., Penteriani, V. & Saastamoinen, M. (2013) Dispersal and  
651 species' responses to climate change. *Oikos*, **122**, 1532-1540.
- 652 Trochet, A., Courtois, E.A., Stevens, V.M., Baguette, M., Chaine, A., Schmeller, D.S.,  
653 Clobert, J. & Wiens, J.J. (2016) Evolution of sex-biased dispersal. *The Quarterly*  
654 *Review of Biology*, **91**, 297-320.
- 655 Tuba, Z., Slack, N.G. & Stark, L.R. (2011) *Bryophyte ecology and climate change*.  
656 Cambridge University Press.
- 657 Tung, S., Mishra, A., Gogna, N., Sadiq, M.A., Shreenidhi, P.M., Sruti, V.R.S., Dorai, K. &  
658 Dey, S. (2018a) Evolution of dispersal syndrome and its corresponding metabolomic  
659 changes. *Evolution*, **72**, 1890-1903.
- 660 Tung, S., Mishra, A., Shreenidhi, P.M., Sadiq, M.A., Joshi, S., Sruti, V.R.S. & Dey, S.  
661 (2018b) Simultaneous evolution of multiple dispersal components and kernel. *Oikos*,  
662 **127**, 34-44.
- 663 Van Heerwaarden, B. & Sgrò, C.M. (2014) Is adaptation to climate change really constrained  
664 in niche specialists? *Proceedings of the Royal Society B: Biological Sciences*, **281**,  
665 20140396.
- 666 Wilkin, T.A. & Sheldon, B.C. (2009) Sex Differences in the Persistence of Natal  
667 Environmental Effects on Life Histories. *Current Biology*, **19**, 1998-2002.
- 668

669 Supporting Information for

670 **Desiccation stress acts as cause as well as cost of dispersal in *Drosophila melanogaster***

671 **Authors:** Abhishek Mishra, Sudipta Tung, V.R. Shree Sruti, P.M. Shreenidhi and Sutirth Dey\*

672 **\*Name and address of the corresponding author:**

673 Sutirth Dey

674 Professor, Biology Division

675 Indian Institute of Science Education and Research, Pune

676 Dr. Homi Bhabha Road, Pune, Maharashtra, India 411 008

677 Tel: [+91-20-25908054](tel:+91-20-25908054)

678 Email: [s.dey@iiserpune.ac.in](mailto:s.dey@iiserpune.ac.in)

679

680 **Text S1. Assay details**

681 Text S1.1 Desiccation resistance assay (Experiments 1 and 3)

682 Desiccation resistance for a fly was measured as the duration that it could survive without food and  
683 moisture. To quantify this, same-sex groups of 10 flies each were introduced into empty transparent  
684 vials and monitored until the death of the last fly in each vial, in a well-lit environment maintained at  
685 25 °C. The survivorship checks were conducted every 2 hours, and 10 such replicate vials were used  
686 per sex.

687

688 Text S1.2 Dispersal assay (Experiment 2)

689 For every two-patch dispersal setup (replicate), we counted the number of male and female flies  
690 that reached the destination during each of the 15-min intervals until the end of dispersal assay (2  
691 h). In addition, we recorded the number and sex of flies that emigrated from the *source* but did not  
692 reach the *destination*, i.e. those found within the *path* tube at the end of the dispersal assay.

693 These data were used to estimate the dispersal propensity, i.e. the proportion of flies that initiated  
694 dispersal from the source, as:

$$\text{Dispersal Propensity} = \frac{(\sum_i n_i) + n_p}{N}$$

695 where  $n_i$  is the number of flies that reached the destination during the  $i^{\text{th}}$  15-min interval,  $n_p$  is the  
696 number of flies found within the path at the end of dispersal assay and  $N$  is the total number of flies  
697 introduced in the setup (here, 120).

698

699 Text S1.3 Fecundity assay (Experiment 4)

700 Female fecundity was assessed as the number of eggs laid per female over a 12-h period. The flies  
701 were anaesthetized under mild CO<sub>2</sub> and pairs of one male and one female each were introduced into  
702 individual 50-mL centrifuge tubes containing a banana-jaggery food cup. The tube had provision for  
703 aeration and the food in the food cup provided a surface for laying eggs. Forty such replicates were  
704 set up per group (i.e. dispersers/non-dispersers) per scenario. The setups were left undisturbed for  
705 12 hours in a well-lit environment maintained at 25 °C. At the end of 12 hours, the flies were  
706 discarded, and the eggs laid on the food were counted under a stereo microscope.

707

708 **Text S2. Detailed statistical analyses**

709 Text S2.1 Experiment 1

```
710 library(lme4)
711 m_Exp1 <- lmer(Desi_res ~ scenario*Dispersal*Sex +
712 (1|Scenario:Dispersal:Sex:Vial), data = d_Exp1)
713
714 library(car)
715 Anova(m_Exp1, type = 'III')
```

Analysis of Deviance Table (Type III Wald chisquare tests)

Response: Desi\_res

|                        | Chisq     | Df | Pr(>Chisq) |     |
|------------------------|-----------|----|------------|-----|
| (Intercept)            | 2761.3559 | 1  | < 2.2e-16  | *** |
| Scenario               | 59.1629   | 2  | 1.422e-13  | *** |
| Dispersal              | 8.0429    | 1  | 0.004568   | **  |
| Sex                    | 162.1124  | 1  | < 2.2e-16  | *** |
| Scenario:Dispersal     | 3.8236    | 2  | 0.147815   |     |
| Scenario:Sex           | 4.3361    | 2  | 0.114399   |     |
| Dispersal:Sex          | 0.0087    | 1  | 0.925823   |     |
| Scenario:Dispersal:Sex | 7.1993    | 2  | 0.027333   | *   |

716

```
717 library(emmeans)
718 em_Exp1 <- emmeans(m_Exp1, ~Scenario:Dispersal:Sex)
719 pairs(em_Exp1, simple = "Dispersal")
```

Scenario = Cause, Sex = F:

| contrast | estimate | SE    | df  | t.ratio | p.value |
|----------|----------|-------|-----|---------|---------|
| Si - So  | -1.698   | 0.599 | 107 | -2.836  | 0.0055  |

Scenario = Control, Sex = F:

| contrast | estimate | SE    | df  | t.ratio | p.value |
|----------|----------|-------|-----|---------|---------|
| Si - So  | -0.560   | 0.583 | 107 | -0.961  | 0.3387  |

Scenario = Cost, Sex = F:

| contrast | estimate | SE    | df  | t.ratio | p.value |
|----------|----------|-------|-----|---------|---------|
| Si - So  | -0.107   | 0.584 | 108 | -0.182  | 0.8556  |

Scenario = Cause, Sex = M:

| contrast | estimate | SE    | df  | t.ratio | p.value |
|----------|----------|-------|-----|---------|---------|
| Si - So  | -1.620   | 0.583 | 107 | -2.780  | 0.0064  |

Scenario = Control, Sex = M:

| contrast | estimate | SE    | df  | t.ratio | p.value |
|----------|----------|-------|-----|---------|---------|
| Si - So  | -0.820   | 0.583 | 107 | -1.407  | 0.1622  |

Scenario = Cost, Sex = M:

| contrast | estimate | SE    | df  | t.ratio | p.value |
|----------|----------|-------|-----|---------|---------|
| Si - So  | -2.900   | 0.583 | 107 | -4.977  | <.0001  |

Degrees-of-freedom method: kenward-roger

720

721



722 Text S2.2 Experiment 2

```
723 library(lme4)
724 m_Exp2 <- glmer(cbind(Disp, Nondisp) ~ Desi_duration*Sex + (1|Day), data =
725 d_Exp2, family = binomial)
```

```
726
727 library(car)
728 Anova(m_Exp2, type = 'III')
```

Analysis of Deviance Table (Type III Wald chisquare tests)

```
Response: cbind(Disp, Nondisp)
              Chisq Df Pr(>Chisq)
(Intercept)    9.2976  1  0.002294 **
Desi_duration  42.5907  5  4.473e-08 ***
Sex            33.2183  1  8.237e-09 ***
Desi_duration:Sex 17.1023  5  0.004310 **
```

729

```
730 library(emmeans)
731 em_Exp2 <- emmeans(m_Exp2, ~Desi_duration:Sex)
732 pairs(em_Exp2, simple = "Desi_duration")
```

```
Sex = Female:
contrast estimate SE df z.ratio p.value
0 - 1      0.2645 0.120 Inf  2.209 0.2334
0 - 2      0.0509 0.121 Inf  0.422 0.9983
0 - 3     -0.0663 0.121 Inf -0.546 0.9942
0 - 4     -0.2879 0.123 Inf -2.334 0.1802
0 - 5     -0.4588 0.125 Inf -3.660 0.0034
1 - 2     -0.2136 0.119 Inf -1.788 0.4732
1 - 3     -0.3308 0.120 Inf -2.752 0.0654
1 - 4     -0.5524 0.122 Inf -4.521 0.0001
1 - 5     -0.7233 0.124 Inf -5.822 <.0001
2 - 3     -0.1172 0.121 Inf -0.968 0.9281
2 - 4     -0.3388 0.123 Inf -2.754 0.0652
2 - 5     -0.5097 0.125 Inf -4.075 0.0007
3 - 4     -0.2216 0.124 Inf -1.791 0.4718
3 - 5     -0.3925 0.126 Inf -3.120 0.0223
4 - 5     -0.1709 0.128 Inf -1.339 0.7635
```

```
Sex = Male:
contrast estimate SE df z.ratio p.value
0 - 1      0.2574 0.120 Inf  2.150 0.2618
0 - 2     -0.2025 0.118 Inf -1.712 0.5235
0 - 3     -0.4471 0.119 Inf -3.768 0.0023
0 - 4     -0.5677 0.119 Inf -4.765 <.0001
0 - 5     -1.0584 0.123 Inf -8.593 <.0001
1 - 2     -0.4599 0.119 Inf -3.850 0.0016
1 - 3     -0.7044 0.120 Inf -5.878 <.0001
1 - 4     -0.8251 0.120 Inf -6.858 <.0001
1 - 5     -1.3158 0.124 Inf -10.582 <.0001
2 - 3     -0.2445 0.118 Inf -2.066 0.3051
2 - 4     -0.3651 0.119 Inf -3.073 0.0258
2 - 5     -0.8559 0.123 Inf -6.967 <.0001
3 - 4     -0.1206 0.119 Inf -1.012 0.9140
3 - 5     -0.6114 0.123 Inf -4.965 <.0001
4 - 5     -0.4908 0.124 Inf -3.971 0.0010
```

Results are given on the log odds ratio (not the response) scale.  
P value adjustment: tukey method for comparing a family of 6 estimates

733

734

735 `pairs(em_Exp2, simple = "Sex")`

```
Desi_duration = 0:
contrast      estimate    SE  df z.ratio p.value
Female - Male  0.6905 0.120 Inf 5.764 <.0001

Desi_duration = 1:
contrast      estimate    SE  df z.ratio p.value
Female - Male  0.6834 0.120 Inf 5.705 <.0001

Desi_duration = 2:
contrast      estimate    SE  df z.ratio p.value
Female - Male  0.4370 0.119 Inf 3.667 0.0002

Desi_duration = 3:
contrast      estimate    SE  df z.ratio p.value
Female - Male  0.3097 0.120 Inf 2.575 0.0100

Desi_duration = 4:
contrast      estimate    SE  df z.ratio p.value
Female - Male  0.4107 0.123 Inf 3.348 0.0008

Desi_duration = 5:
contrast      estimate    SE  df z.ratio p.value
Female - Male  0.0908 0.129 Inf 0.707 0.4797
```

Results are given on the log odds ratio (not the response) scale.

736

737

738 Text S2.3 Experiment 3

```
739 library(lme4)
740 m_Exp3 <- lmer(Desi_res ~ sel*Dispersal*Sex + (1|Block) +
741 (1|sel:Dispersal:Sex:Block:Vial), data = d_Exp3)
742 library(car)
743 Anova(m_Exp3, type = 'III')
```

Analysis of Deviance Table (Type III wald chisquare tests)

```
Response: Desi_res
              Chisq Df Pr(>Chisq)
(Intercept)  499.5846  1 < 2.2e-16 ***
sel           90.7786  1 < 2.2e-16 ***
Dispersal     3.5418  1  0.059840 .
Sex           17.1953  1  3.373e-05 ***
sel:Dispersal  2.3279  1  0.127075
sel:Sex       51.2349  1  8.195e-13 ***
Dispersal:Sex  9.5162  1  0.002037 **
sel:Dispersal:Sex 0.1944  1  0.659241
```

744

```
745 library(emmeans)
746 em_Exp3 <- emmeans(m_Exp3, ~Dispersal:Sex)
747 pairs(em_Exp3, simple = "Dispersal")
```

```
Sex = F:
contrast estimate    SE df z.ratio p.value
Si - So    -0.928 0.222 Inf  -4.187 <.0001
```

```
Sex = M:
contrast estimate    SE df z.ratio p.value
Si - So    -2.445 0.225 Inf -10.879 <.0001
```

Results are averaged over the levels of: sel  
Degrees-of-freedom method: asymptotic

748

749

750 Text S2.4 Experiment 4

```
751 library(stats)
752 m_Exp4 <- glm(Fecundity ~ Scenario*Dispersal, data = d_Exp4, family =
753 quasipoisson)
```

```
754 library(car)
755 Anova(m_Exp4, type = 'III')
```

Analysis of Deviance Table (Type III tests)

Response: Fecundity

|                    | LR     | Chisq | Df        | Pr(>Chisq) |
|--------------------|--------|-------|-----------|------------|
| Scenario           | 31.679 | 2     | 1.321e-07 | ***        |
| Dispersal          | 2.004  | 1     | 0.1568845 |            |
| Scenario:Dispersal | 17.897 | 2     | 0.0001299 | ***        |

756

```
757 library(emmeans)
758 em_Exp4 <- emmeans(m_Exp4, ~Scenario:Dispersal)
759 pairs(em_Exp4, simple = "Dispersal")
```

Scenario = Cause:

| contrast | estimate | SE    | df  | z.ratio | p.value |
|----------|----------|-------|-----|---------|---------|
| Si - So  | 0.243    | 0.172 | Inf | 1.410   | 0.1584  |

Scenario = Control:

| contrast | estimate | SE    | df  | z.ratio | p.value |
|----------|----------|-------|-----|---------|---------|
| Si - So  | 0.109    | 0.227 | Inf | 0.478   | 0.6324  |

Scenario = Cost:

| contrast | estimate | SE    | df  | z.ratio | p.value |
|----------|----------|-------|-----|---------|---------|
| Si - So  | -0.944   | 0.246 | Inf | -3.844  | 0.0001  |

Results are given on the log (not the response) scale.

760

761
